# Supplementary material for: Salvage Therapy for Relapsed Malignant Pleural Mesothelioma: A Systematic Review and Network Meta-Analysis
Source: MDPI journal article supplement (doi:10.3390/cancers14010182), 2021-12-30
Supplement: s1 [file s1]

# Supplementary materials: Salvage Therapy for Relapsed Malignant Pleural Mesothelioma: A Systematic Review and Network Meta-Analysis

Yu-Chen Tsai, Hsiao-Ling Chen, Tai-Huang Lee, Hsiu-Mei Chang, Kuan-Li Wu, Cheng-Hao Chuang, Yong-Chieh Chang, Yu-Kang Tu, Jen-Yu Hung, Chih-Jen Yang and Inn-Wen Chong

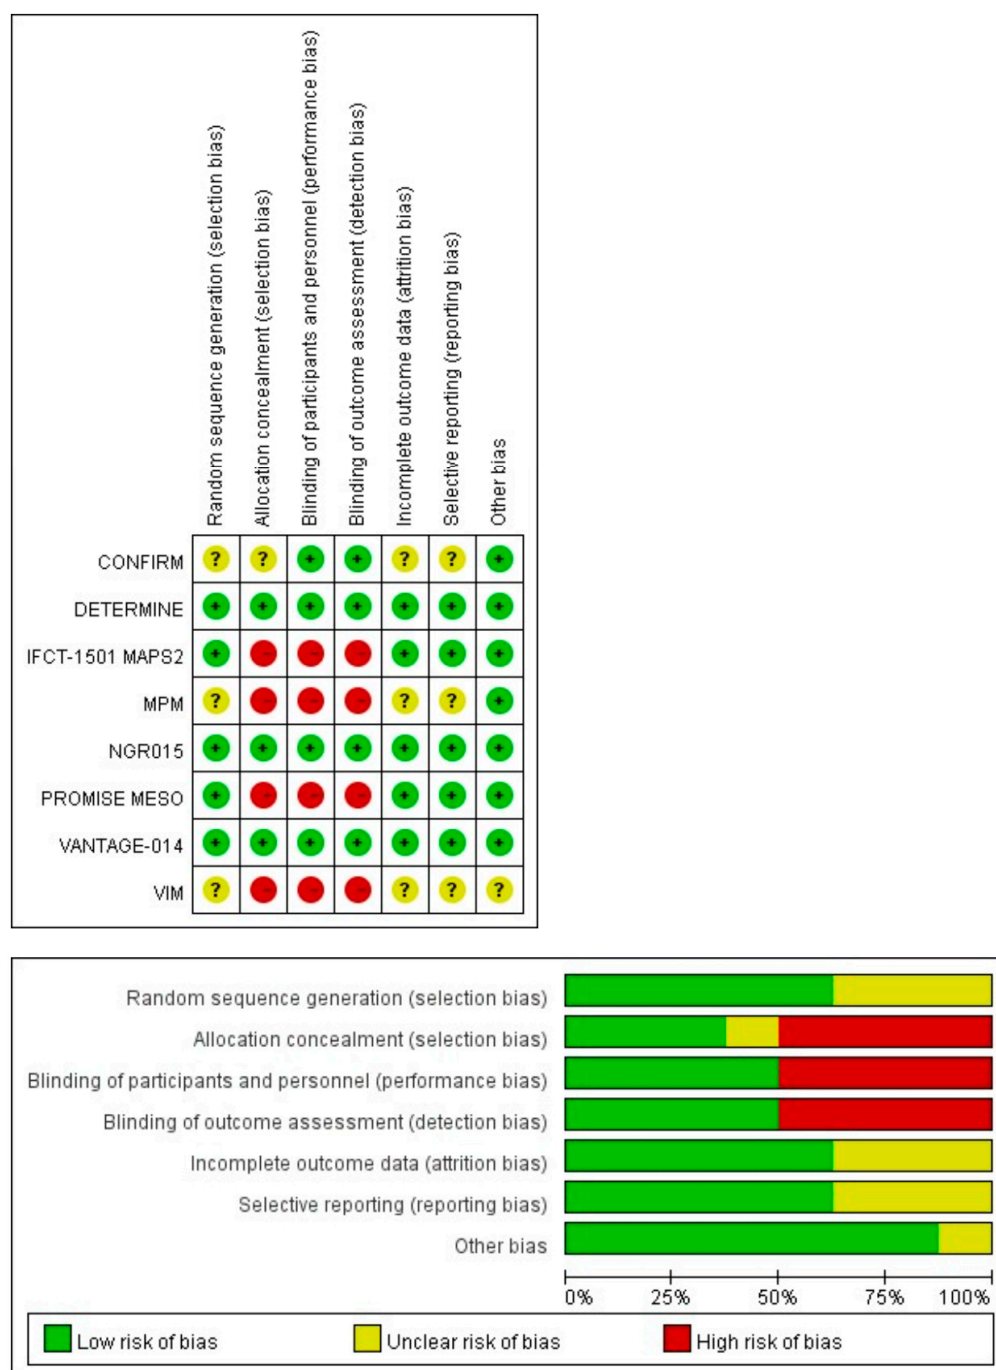

Figure S1. Quality assessment by the Risk of Bias (ROB) tool.

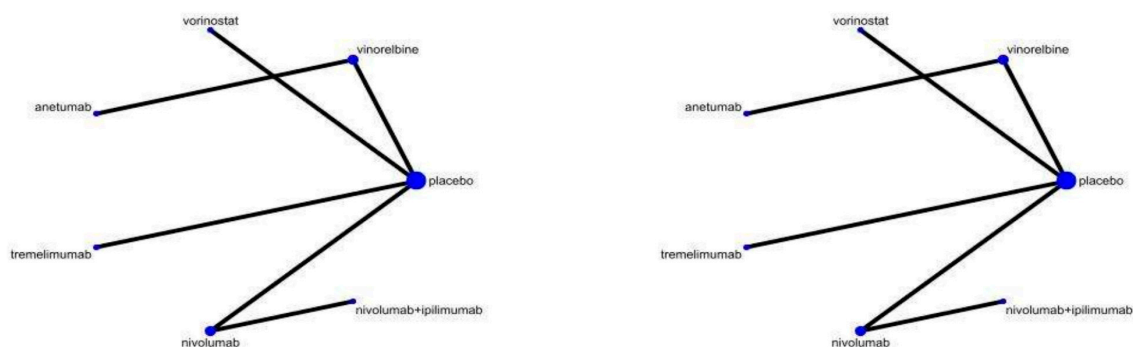

**Figure S2.** Network constructions for comparisons of overall survival (OS) and progression-free survival (PFS). **(A)** Network constructions for comparisons of OS (hazard ratio [HR]). **(B)** Network constructions for comparisons of PFS (HR).

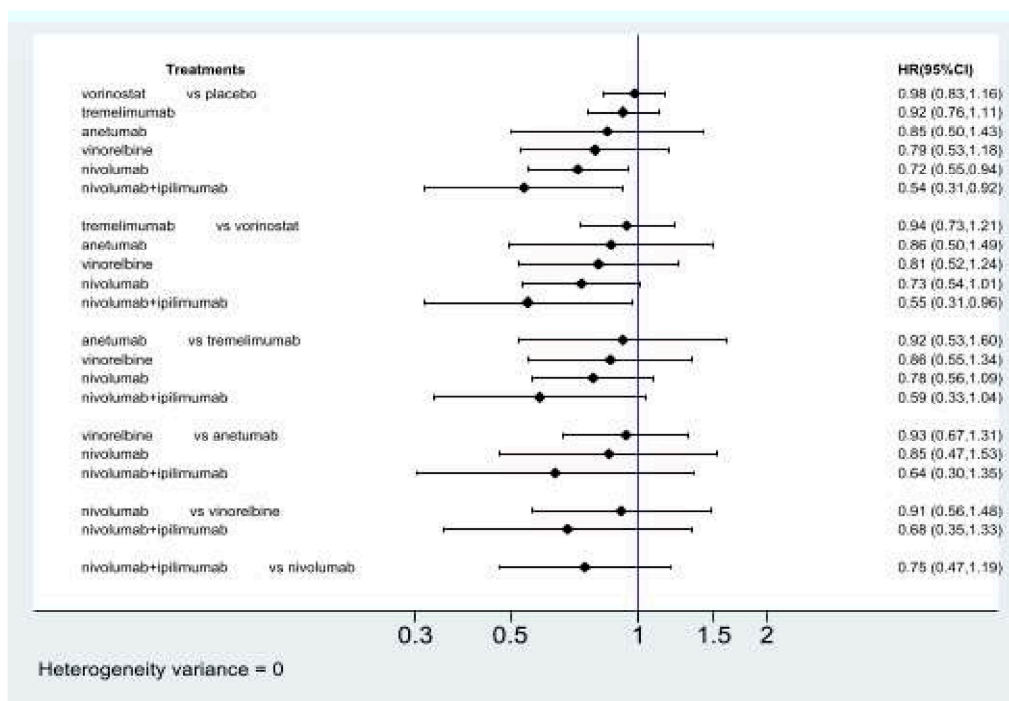

(A)

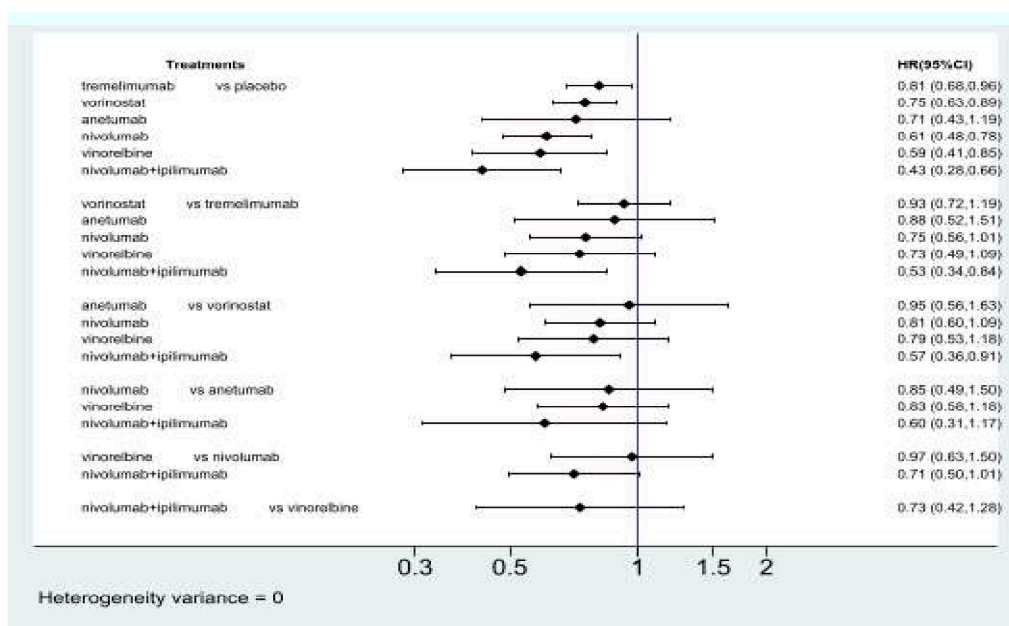

(B)

**Figure S3.** Summary of effect sizes for pairwise comparisons. (A) Hazard ratio for overall survival (OS). (B) Hazard ratio for progression-free survival (PFS).

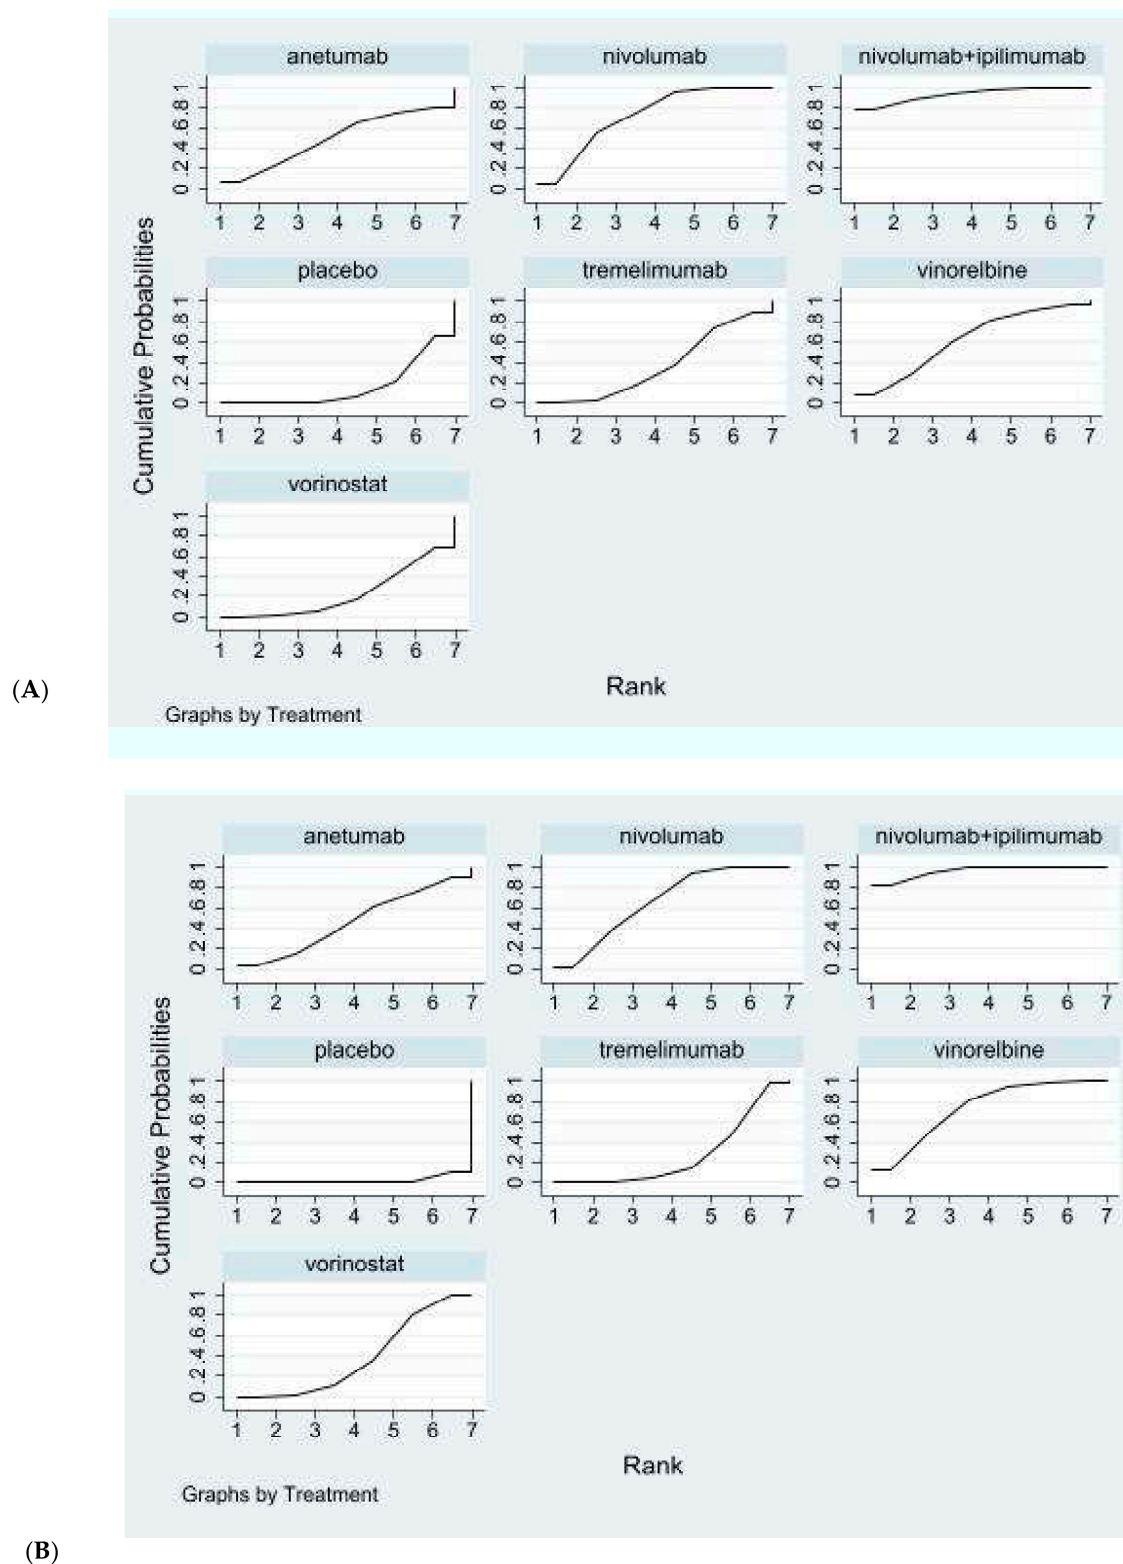

**Figure S4.** Cumulative ranking scores for the different interventions. (A) Hazard ratio for overall survival (OS). (B) Hazard ratio for progression-free survival (PFS).

**Table S1.** Search strategy. Search strategy in Embase ®

- The Embase database: Contains biomedical literature from 1974 to present.

- The MEDLINE & PubMed database: Covers journals from 1966 to present.
- Embase Classic: The Embase back file covers almost 2 million biomedical and pharmacological citations drawn from over 3,000 international titles between 1947 and 1973.

| Search | Query                                                                                                                                                                                                                                                                                                                                                                                                                   | Results   |
|--------|-------------------------------------------------------------------------------------------------------------------------------------------------------------------------------------------------------------------------------------------------------------------------------------------------------------------------------------------------------------------------------------------------------------------------|-----------|
| #1     | 'mesothelioma'/exp OR 'celothelioma' OR 'cystic mesothelioma' OR 'malignant mesothelioma' OR 'mesothelial neoplasms' OR 'mesothelioma' OR 'mesothelioma, cystic' OR 'mesothelioma, malignant' OR 'mesotheliomatosis' OR 'neoplasms, mesothelial' OR 'submesothelial cancer'                                                                                                                                             | 30,966    |
| #2     | mesothelioma:ab,ti OR ((malignant NEAR/3 mesothelioma*):ab,ti) OR ((neoplasm* NEAR/3 mesothelia*):ab,ti)                                                                                                                                                                                                                                                                                                                | 23,406    |
| #3     | #1 OR #2                                                                                                                                                                                                                                                                                                                                                                                                                | 31,043    |
| #4     | relapse*: ab,ti OR refractory:ab,ti OR progress*:ab,ti OR ((second* NEAR/2 line):ab,ti) OR ((third* NEAR/2 line):ab,ti)                                                                                                                                                                                                                                                                                                 | 1,990,458 |
| #5     | 'pemetrexed'/exp OR 'alimta' OR 'pemetrexed' OR 'pemetrexed disodium' OR 'pemetrexed disodium hemipentahydrate' OR 'pemetrexed ditromethamine' OR 'pemetrexed sodium' OR 'pemetrexed tromethamine'                                                                                                                                                                                                                      | 16,207    |
| #6     | #3 AND #4 AND #5                                                                                                                                                                                                                                                                                                                                                                                                        | 1057      |
| #7     | 'clinical trial'/de OR 'randomized controlled trial'/de OR 'randomization'/de OR 'single blind procedure'/de OR 'double blind procedure'/de OR 'crossover procedure'/de OR ('randomized controlled' NEXT/1 trial*) OR rct OR 'randomly allocated' OR 'allocated randomly' OR 'random allocation' OR (allocated NEAR/2 random) OR (single NEXT/1 blind*) OR (double NEXT/1 blind*) OR ((treble OR triple) NEAR/1 blind*) | 1,827,860 |
| #8     | #6 AND #7                                                                                                                                                                                                                                                                                                                                                                                                               | 340       |
| #9     | [adolescent]/lim OR [child]/lim OR [preschool]/lim OR [school]/lim                                                                                                                                                                                                                                                                                                                                                      | 3,220,787 |
| #10    | #8 NOT #9                                                                                                                                                                                                                                                                                                                                                                                                               | 338       |

#### Search strategy in PubMed

| Search | Query                                                                                                                                                                                                                                                                                                                                                                                                                                     | Results   |
|--------|-------------------------------------------------------------------------------------------------------------------------------------------------------------------------------------------------------------------------------------------------------------------------------------------------------------------------------------------------------------------------------------------------------------------------------------------|-----------|
| #1     | "mesothelioma"[Title/Abstract] OR "celothelioma"[Title/Abstract] OR "cystic mesothelioma"[Title/Abstract] OR "malignant mesothelioma"[Title/Abstract] OR "mesothelial neoplasms"[Title/Abstract] OR "mesothelioma"[Title/Abstract] OR "mesotheliomatosis"[Title/Abstract] OR mesotheli* neoplasm*[Title/Abstract] OR neoplasm* mesotheli*[Title/Abstract] OR mesotheli* malignant[Title/Abstract] OR malignant mesotheli*[Title/Abstract] | 18,014    |
| #2     | "Mesothelioma"[MeSH Terms]                                                                                                                                                                                                                                                                                                                                                                                                                | 14,759    |
| #3     | #1 OR #2                                                                                                                                                                                                                                                                                                                                                                                                                                  | 20,335    |
| #4     | "relapse*"[Title/Abstract] OR "refractory"[Title/Abstract] OR "progress*"[Title/Abstract] OR "second*"[Title/Abstract] OR "third*"[Title/Abstract]                                                                                                                                                                                                                                                                                        | 3,506,709 |
| #5     | "Pemetrexed"[Title/Abstract] OR "alimta"[Title/Abstract] OR "Pemetrexed"[MeSH Terms]                                                                                                                                                                                                                                                                                                                                                      | 3,798     |
| #6     | #3 AND #4 AND #5                                                                                                                                                                                                                                                                                                                                                                                                                          | 372       |
| #7     | (randomized controlled trial[pt] OR controlled clinical trial[pt] OR randomized[tiab] OR placebo[tiab] OR clinical trials as topic[mesh:noexp] OR randomly[tiab] OR trial[ti])                                                                                                                                                                                                                                                            | 1,401,059 |
| #8     | #6 AND #7                                                                                                                                                                                                                                                                                                                                                                                                                                 | 114       |
| #9     | ("infant"[mesh] OR "child"[mesh] OR "adolescent"[mesh] OR adolescent[Title/Abstract] OR child*[Title/Abstract] OR infant[Title/Abstract] OR newborn[Title/Abstract])                                                                                                                                                                                                                                                                      | 4,193,160 |
| #10    | #8 NOT #9                                                                                                                                                                                                                                                                                                                                                                                                                                 | 113       |
